# Supplementary material
Source: bioRxiv or medRxiv preprint supplement (https://www.biorxiv.org/highwire/filestream/62242/field_highwire_adjunct_files/7/130948-6.pdf)
Supplement: Supplementary file [file 130948-6.pdf]

| <b>Name</b>                  | <b>Cell Definitions</b>                              |
|------------------------------|------------------------------------------------------|
| B cells                      | CD14-   CD33-   CD3-   CD19+   CD20+                 |
| CD16- monocytes              | CD14+   CD33+   CD16-                                |
| CD16+ monocytes              | CD14+   CD33+   CD16+                                |
| CD4+ T cells                 | CD14-   CD33-   CD3+   CD4+                          |
| CD8+ T cells                 | CD14-   CD33-   CD3+   CD8+                          |
| central memory CD4+ T cells  | CD14-   CD33-   CD3+   CD4+   CCR7+   CD45RA-        |
| central memory CD8+ T cells  | CD14-   CD33-   CD3+   CD8+   CCR7+   CD45RA-        |
| effector CD4+ T cells        | CD14-   CD33-   CD3+   CD4+   CCR7-   CD45RA+        |
| effector CD8+ T cells        | CD14-   CD33-   CD3+   CD8+   CCR7-   CD45RA+        |
| effector memory CD4+ T cells | CD14-   CD33-   CD3+   CD4+   CCR7-   CD45RA-        |
| effector memory CD8+ T cells | CD14-   CD33-   CD3+   CD8+   CCR7-   CD45RA-        |
| gamma-delta T cells          | CD14-   CD33-   TCRgd+                               |
| lymphocytes                  | CD14-   CD33-                                        |
| memory B cells               | CD14-   CD33-   CD3-   CD19+   CD20+   CD24+   CD38- |
| monocytes                    | CD14+   CD33+                                        |
| naive B cells                | CD14-   CD33-   CD3-   CD19+   CD20+   CD24-   CD38+ |
| naive CD4+ T cells           | CD14-   CD33-   CD3+   CD4+   CCR7+   CD45RA+        |
| naive CD8+ T cells           | CD14-   CD33-   CD3+   CD8+   CCR7+   CD45RA+        |
| NK cells                     | CD14-   CD33-   CD3-   CD16+   CD56+                 |
| NKT cells                    | CD14-   CD33-   CD3+   CD56+                         |
| plasmablasts                 | CD14-   CD33-   CD3-   CD20-   CD27+   CD38+         |
| T cells                      | CD14-   CD33-   CD3+                                 |
| transitional B cells         | CD14-   CD33-   CD3-   CD19+   CD20+   CD24+   CD38+ |
| Tregs                        | CD14-   CD33-   CD3+   CD4+   CD25+   CD127-         |

Supplementary Table 1: A list of cell definitions used to identify the 24 cell populations in cytometry data (SDY420) from ImmPort. The cell definitions are created based on the author's gating strategy provided in SDY420.
